# Supplementary material for: An electron deficient dicyanovinylene-ladder-type pentaphenylene derivative for n-type organic field effect transistors
Source: Royal Society of Chemistry journal article supplement (doi:10.1039/c3tc31925c), 2013-11-22

*Supporting Information for*

**Electron deficient dicyanovinylene-ladder-type pentaphenylene derivative  
for n-type Organic Field Effect Transistors**

*Emmanuel Jacques,<sup>a</sup> Maxime Romain,<sup>b</sup> Ali Yassin,<sup>b</sup> Sarah Bebiche,<sup>a</sup> Maxime Harnois,<sup>a</sup> Tayeb Mohammed-Brahim,<sup>a</sup> Joëlle Rault-Berthelot,<sup>b</sup> Cyril Poriel<sup>\*b</sup>*

<sup>a</sup> UMR CNRS 6164-Institut d'Électronique et des Télécommunications de Rennes-  
Département Microélectronique & Microcapteurs, Bât.11B, Université Rennes 1, Campus de  
Beaulieu 35042 Rennes Cedex, France

<sup>b</sup> UMR CNRS 6226-Institut des Sciences Chimiques de Rennes- Equipe Matière Condensée et  
Systèmes Electroactifs, Bat 10C, Campus de Beaulieu - 35042 Rennes cedex France

## TABLE OF CONTENTS

|                                |   |
|--------------------------------|---|
| PHOTOPHYSICAL PROPERTIES ..... | 3 |
| THEORETICAL MODELING .....     | 5 |
| THERMAL ANALYSES.....          | 8 |

## PHOTOPHYSICAL PROPERTIES

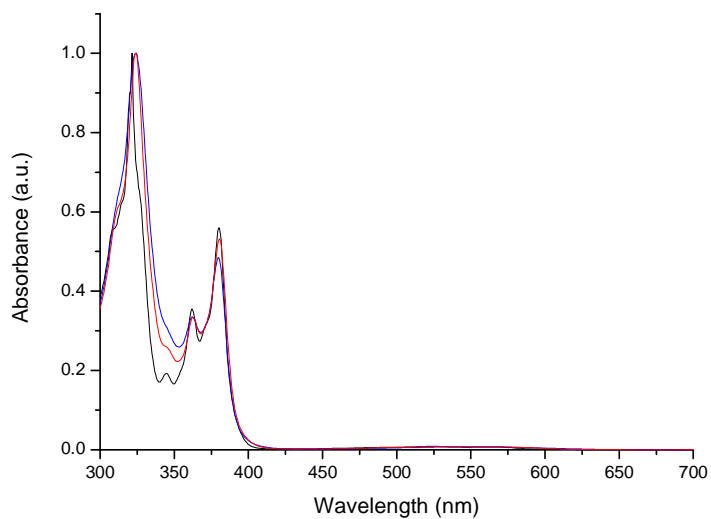

**Figure S1.** Absorption spectra of **LPP(=O)<sub>2</sub>** (300/700 nm) in cyclohexane (black line), in THF (red line) and in ethanol (blue line)

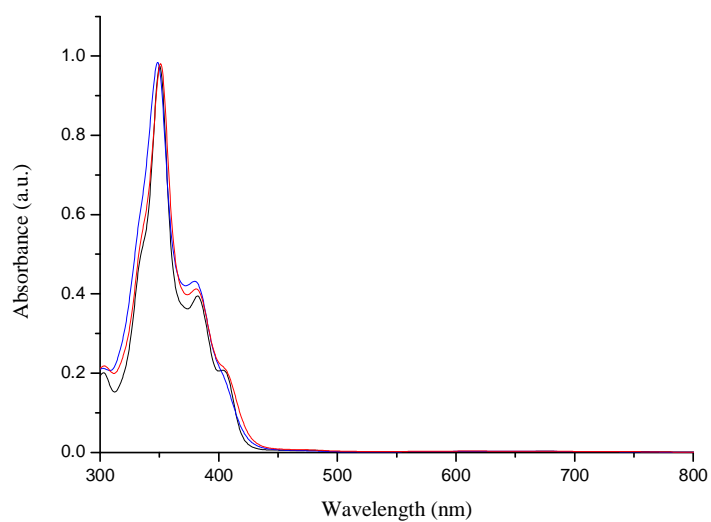

**Figure S2.** Absorption spectra of **LPP(=C(CN)<sub>2</sub>)<sub>2</sub>** (300/850 nm range) in cyclohexane (black line), in THF (red line) and in ethanol (blue line)

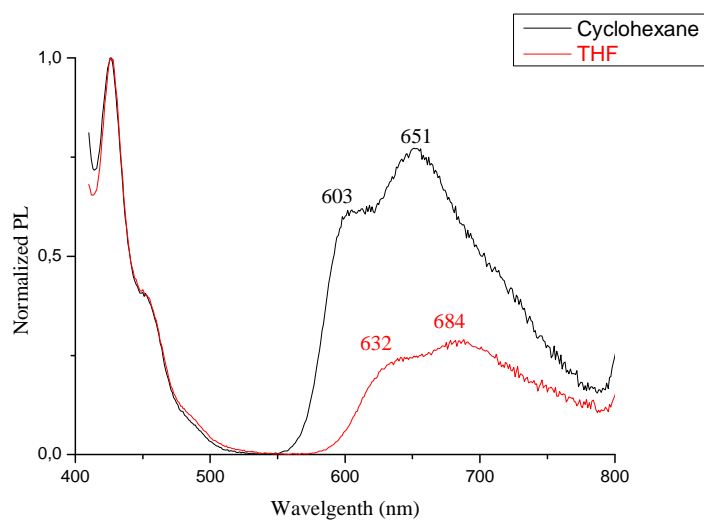

**Figure S3.** Fluorescence spectra of **4** in cyclohexane and in THF ( $\lambda_{exc} = 400$  nm)

## THEORETICAL MODELING

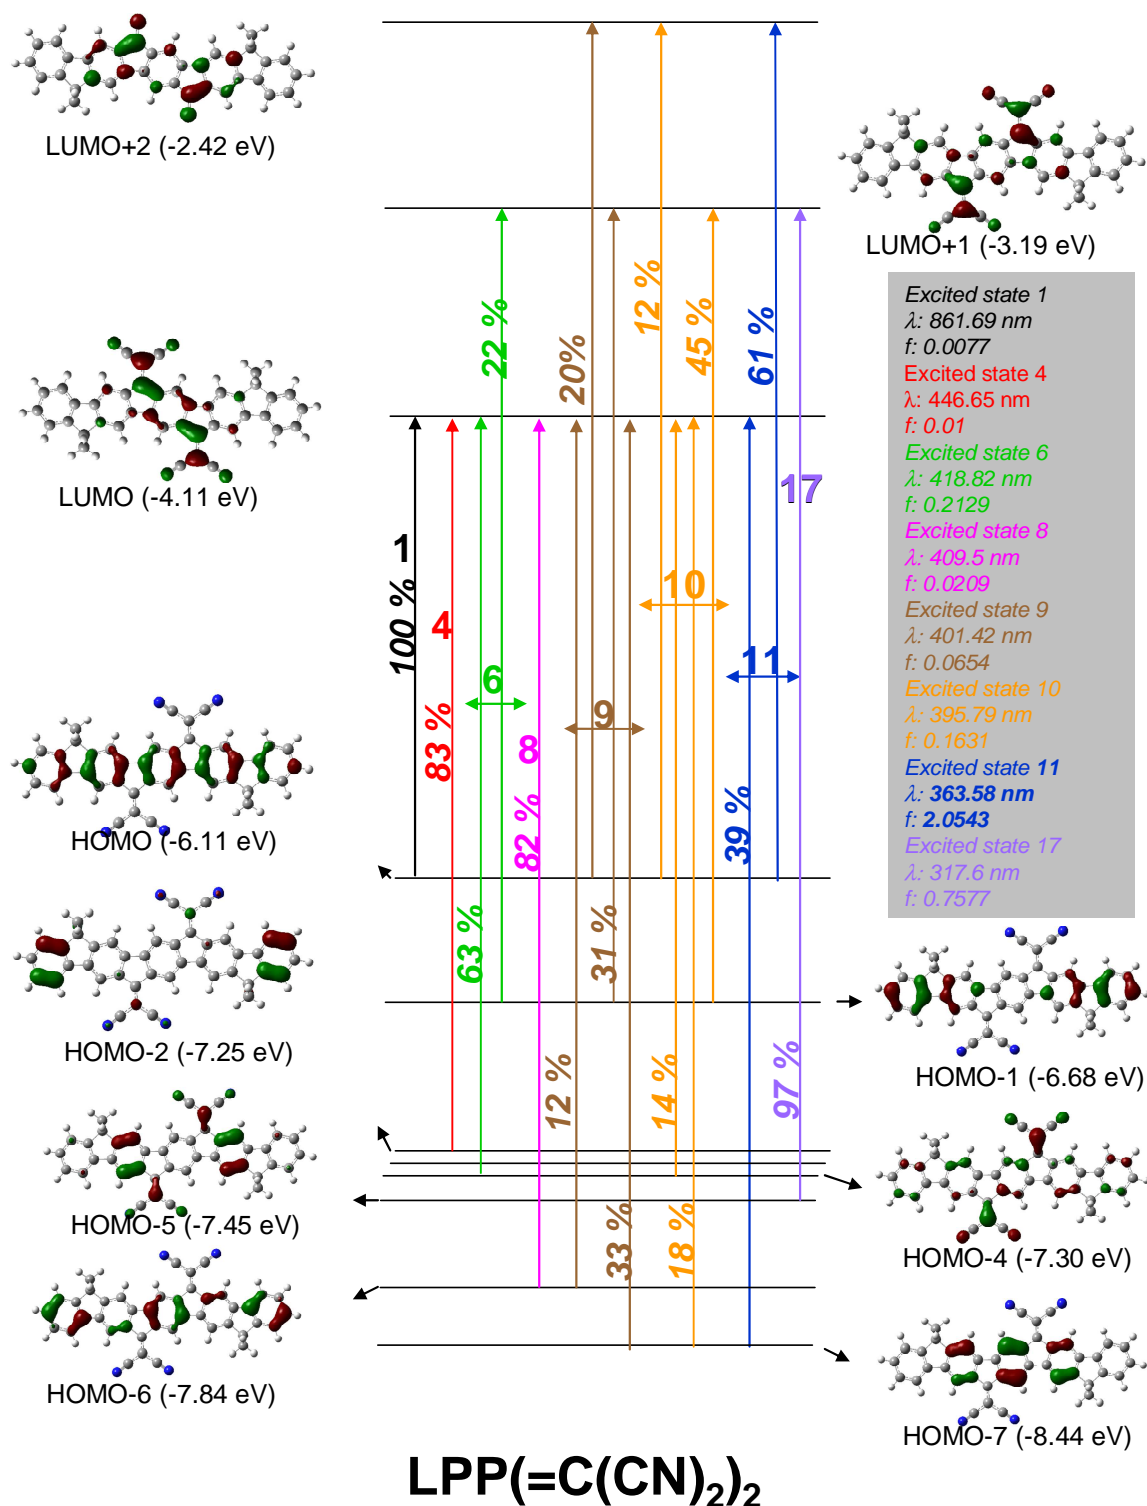

**Figure S4.** Calculated frontier molecular orbitals by DFT and the 6<sup>th</sup> first calculated electronic transitions by TD-DFT of  $\text{LPP}(\text{C}(\text{CN})_2)_2$ , after geometry optimization with DFT B3LYP/6-311G+(d,p), shown with a cut-off  $0.04 [\text{e bohr}^{-3}]^{1/2}$

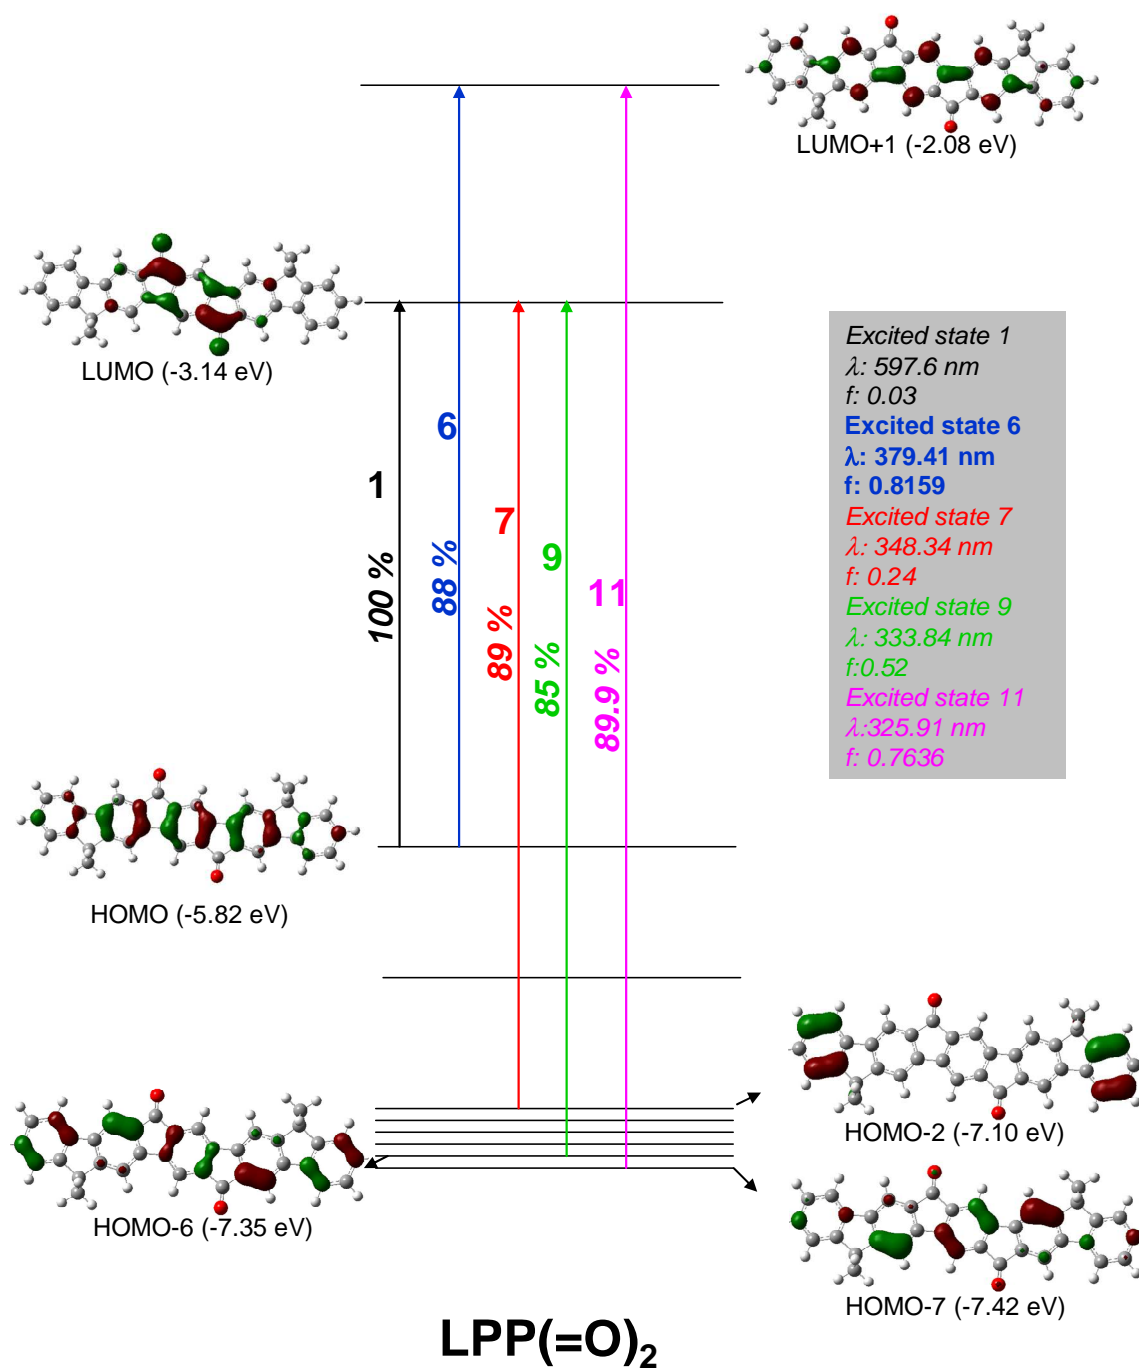

**Figure S5:** Calculated frontier molecular orbitals by DFT and the 6<sup>th</sup> first calculated electronic transitions by TD-DFT of  $\text{LPP}(=\text{O})_2$ , after geometry optimization with DFT B3LYP/6-311G+(d,p), shown with a cut-off 0.04 [e bohr<sup>-3</sup>]<sup>1/2</sup>

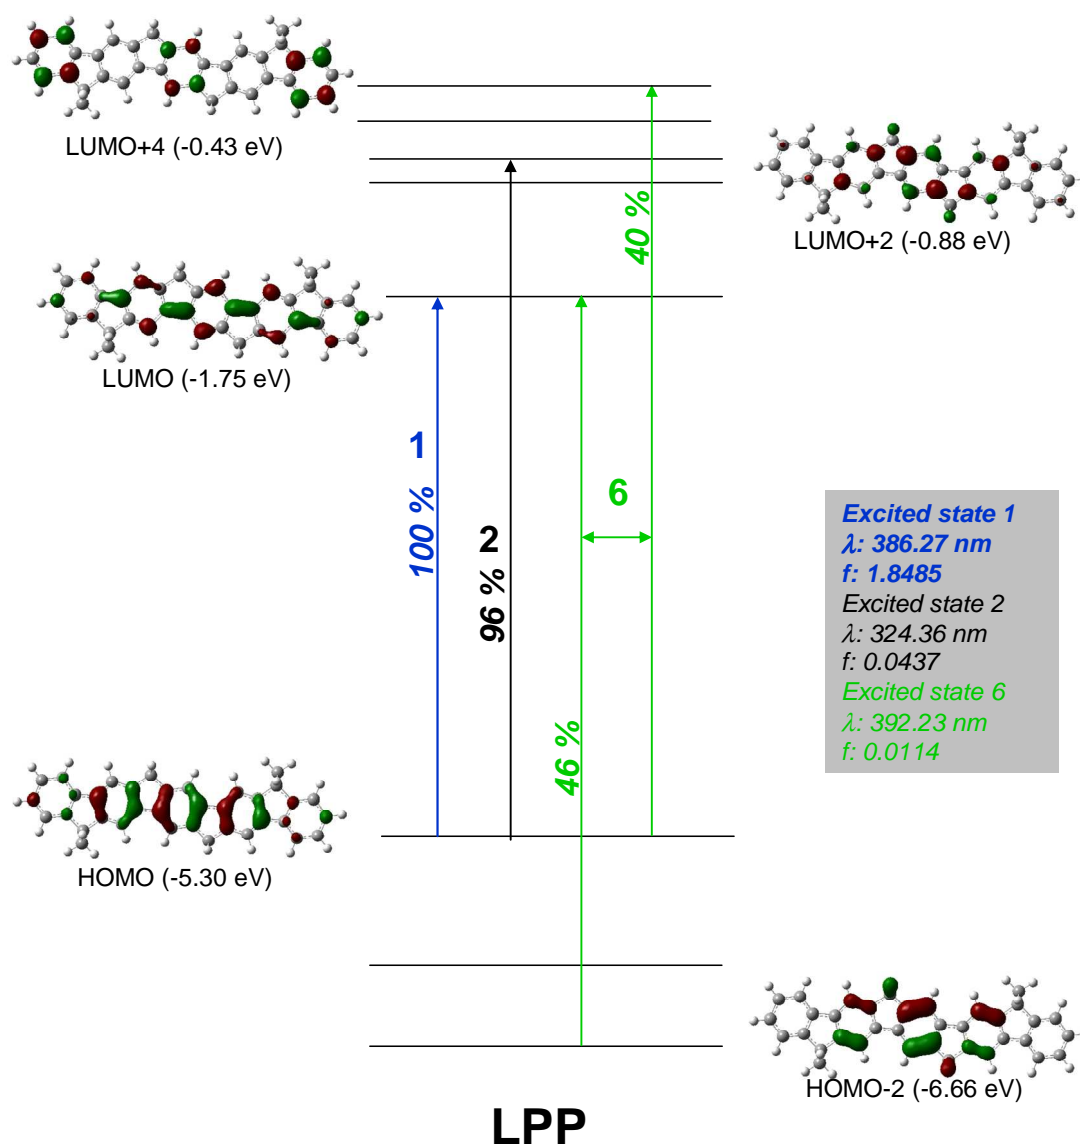

**Figure S6:** Calculated frontier molecular orbitals by DFT and the 6<sup>th</sup> first calculated electronic transitions by TD-DFT of **LPP**, after geometry optimization with DFT B3LYP/6-311G+(d,p), shown with a cut-off  $0.04 [e \text{ bohr}^{-3}]^{1/2}$

## THERMAL ANALYSES

**LPP(=O)<sub>2</sub>**

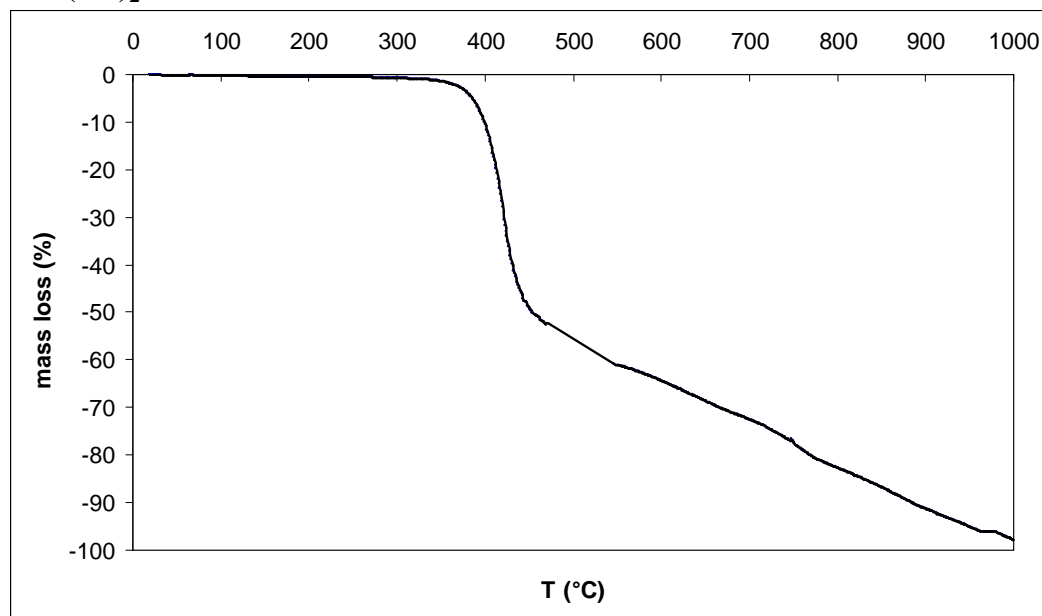

**T<sub>d</sub>=385°C**

Fig S7: ATG curve of **LPP(=C(CN)<sub>2</sub>)<sub>2</sub>**

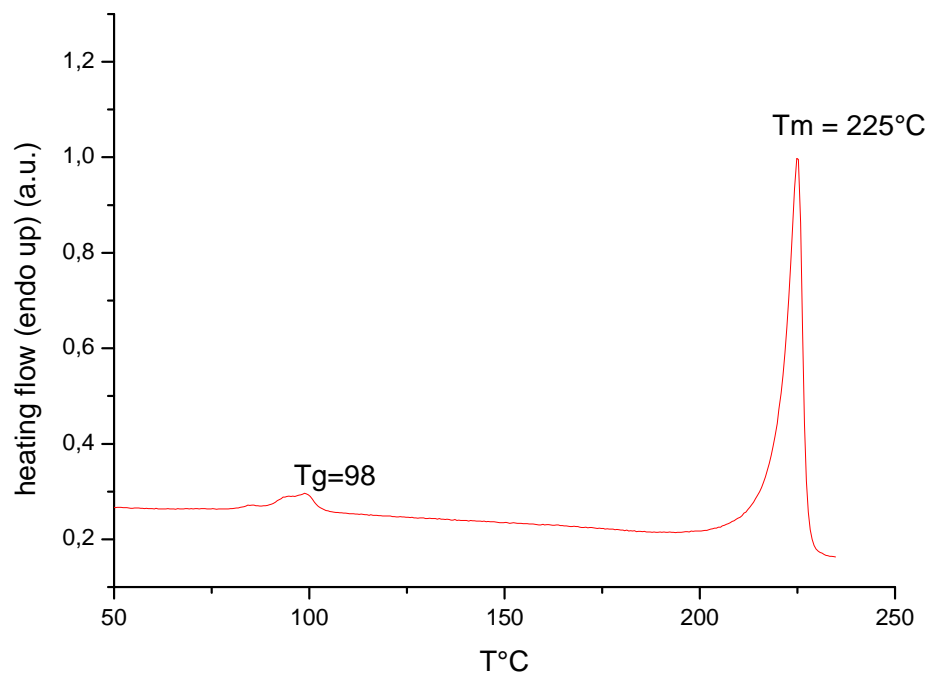

Fig S8: DSC curve (second heating cycle) of **LPP(=O)<sub>2</sub>**



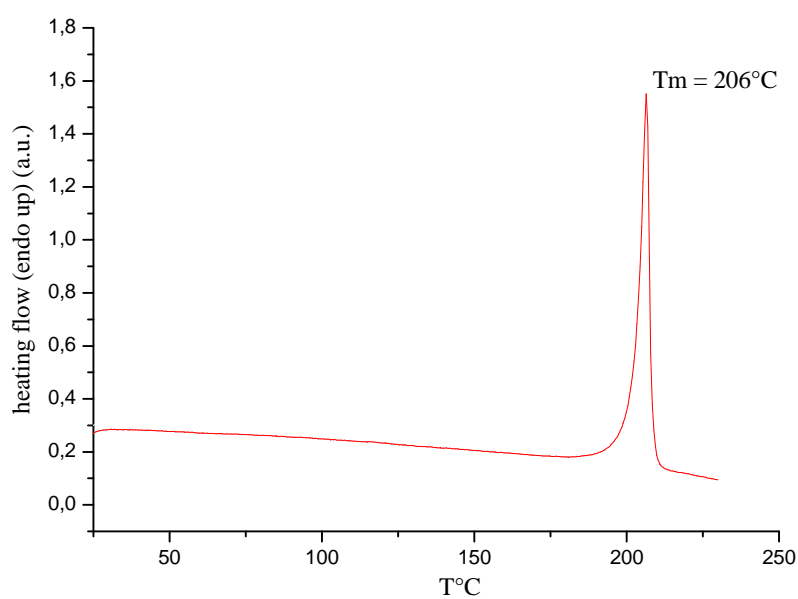

Fig S9: DSC curve (second heating cycle) of  $\text{LPP}(\text{=C}(\text{CN})_2)_2$

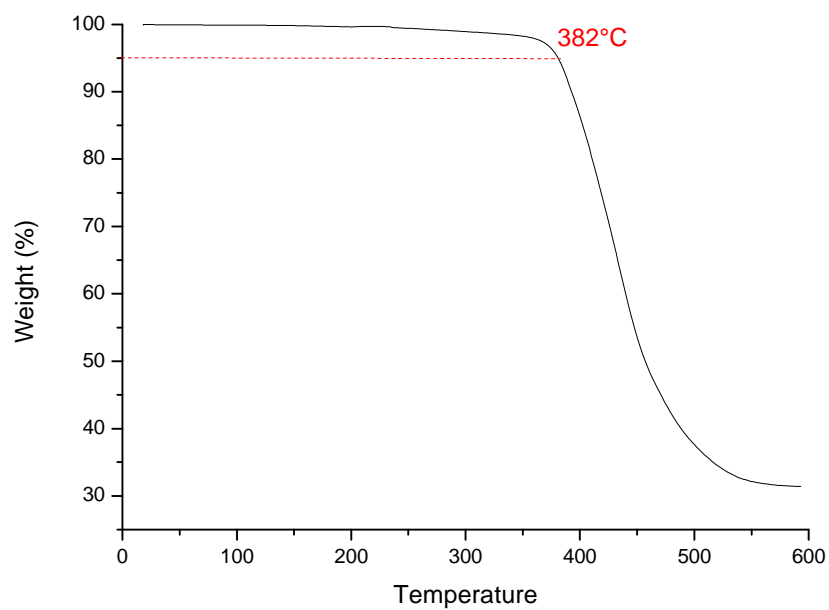

$T_d = 382^\circ\text{C}$

Fig S10: ATG curve of  $\text{LPP}(\text{=C}(\text{CN})_2)_2$

Copy of NMR spectra

$^1\text{H NMR (CDCl}_3\text{) LPP(C}=\text{(CN)}_2\text{)}_2$

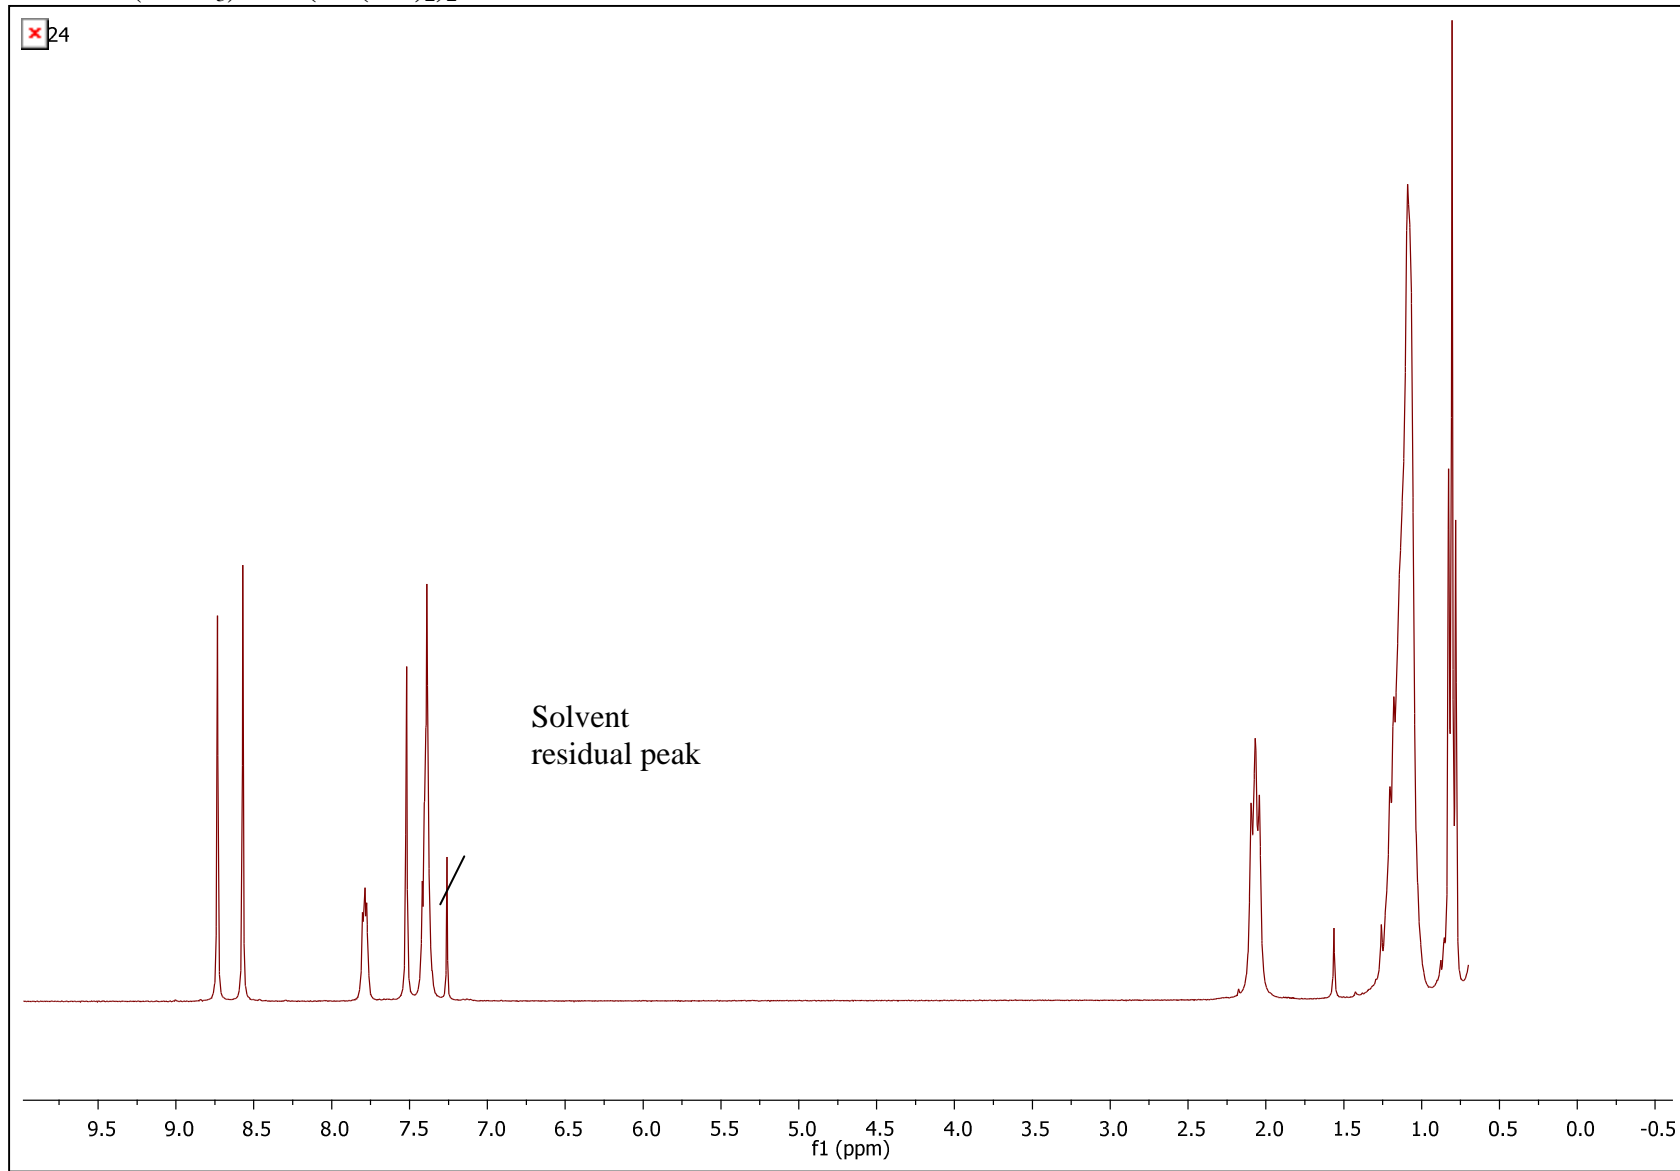

$^{13}\text{C}$  NMR ( $\text{CDCl}_3$ ) **LPP(C=(CN) $_2$ ) $_2$**

ay24

160.13  
150.52  
143.54  
143.45  
140.57  
139.77  
139.07  
133.48  
128.49  
127.35  
122.96  
120.20  
118.23  
117.91  
115.43  
113.55  
113.27  
77.42  
77.20  
77.00  
76.83  
76.58  
56.30  
40.13  
31.72  
29.85  
29.19  
29.13  
23.85  
22.55  
14.03

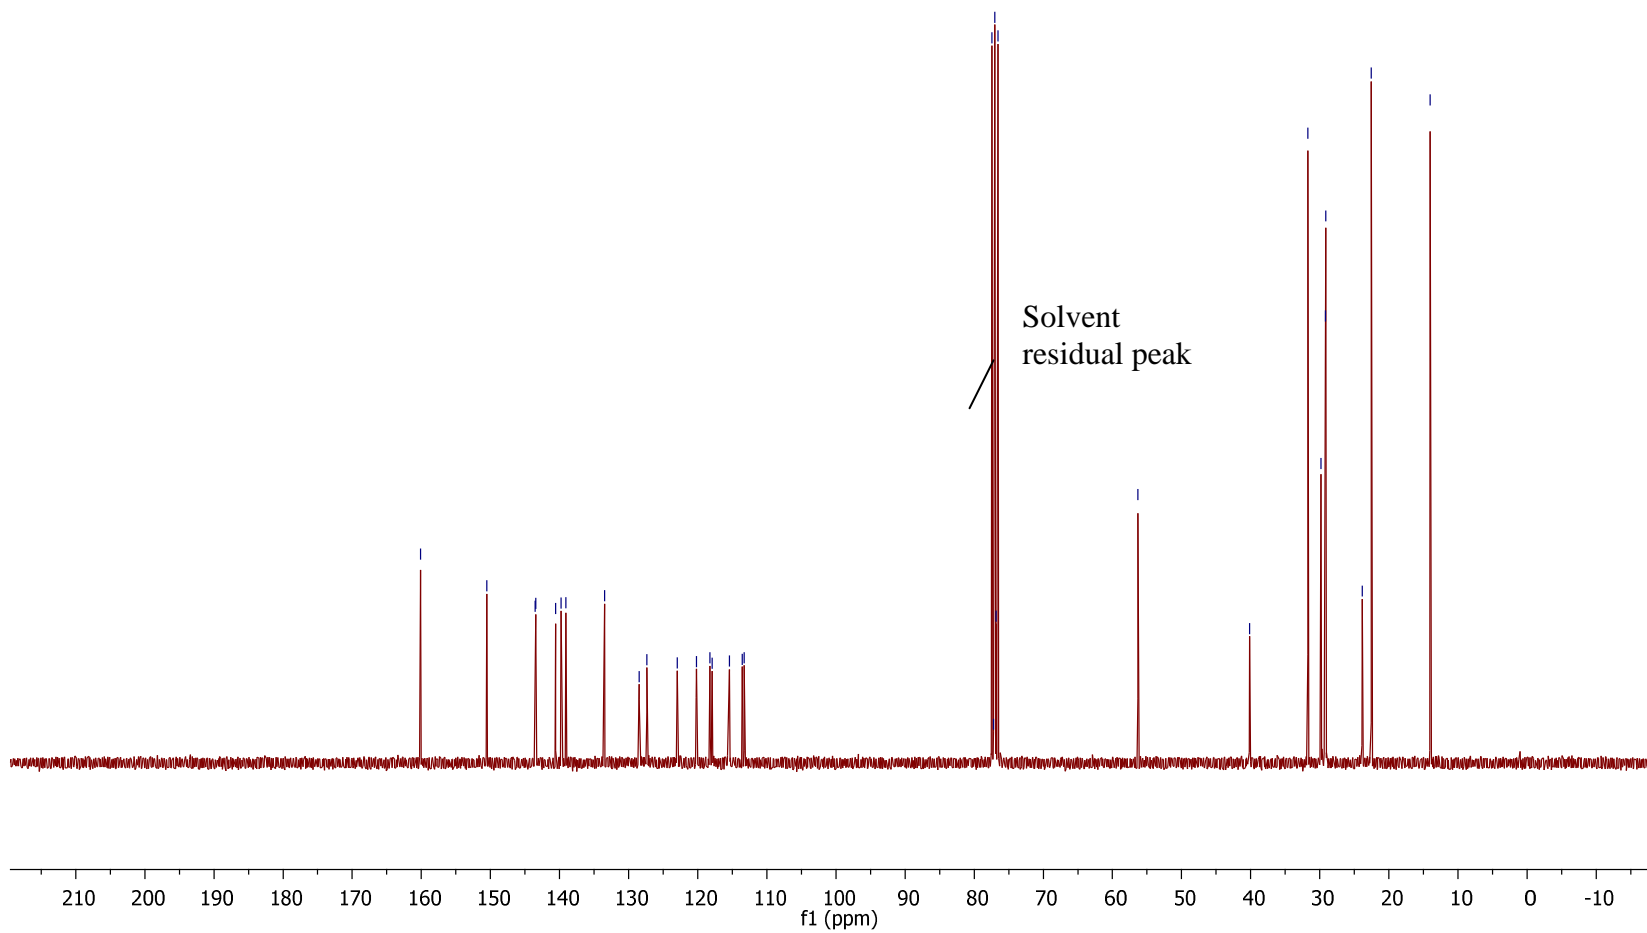

DEPT (CDCl<sub>3</sub>) **LPP(C=(CN)<sub>2</sub>)<sub>2</sub>**

ay24

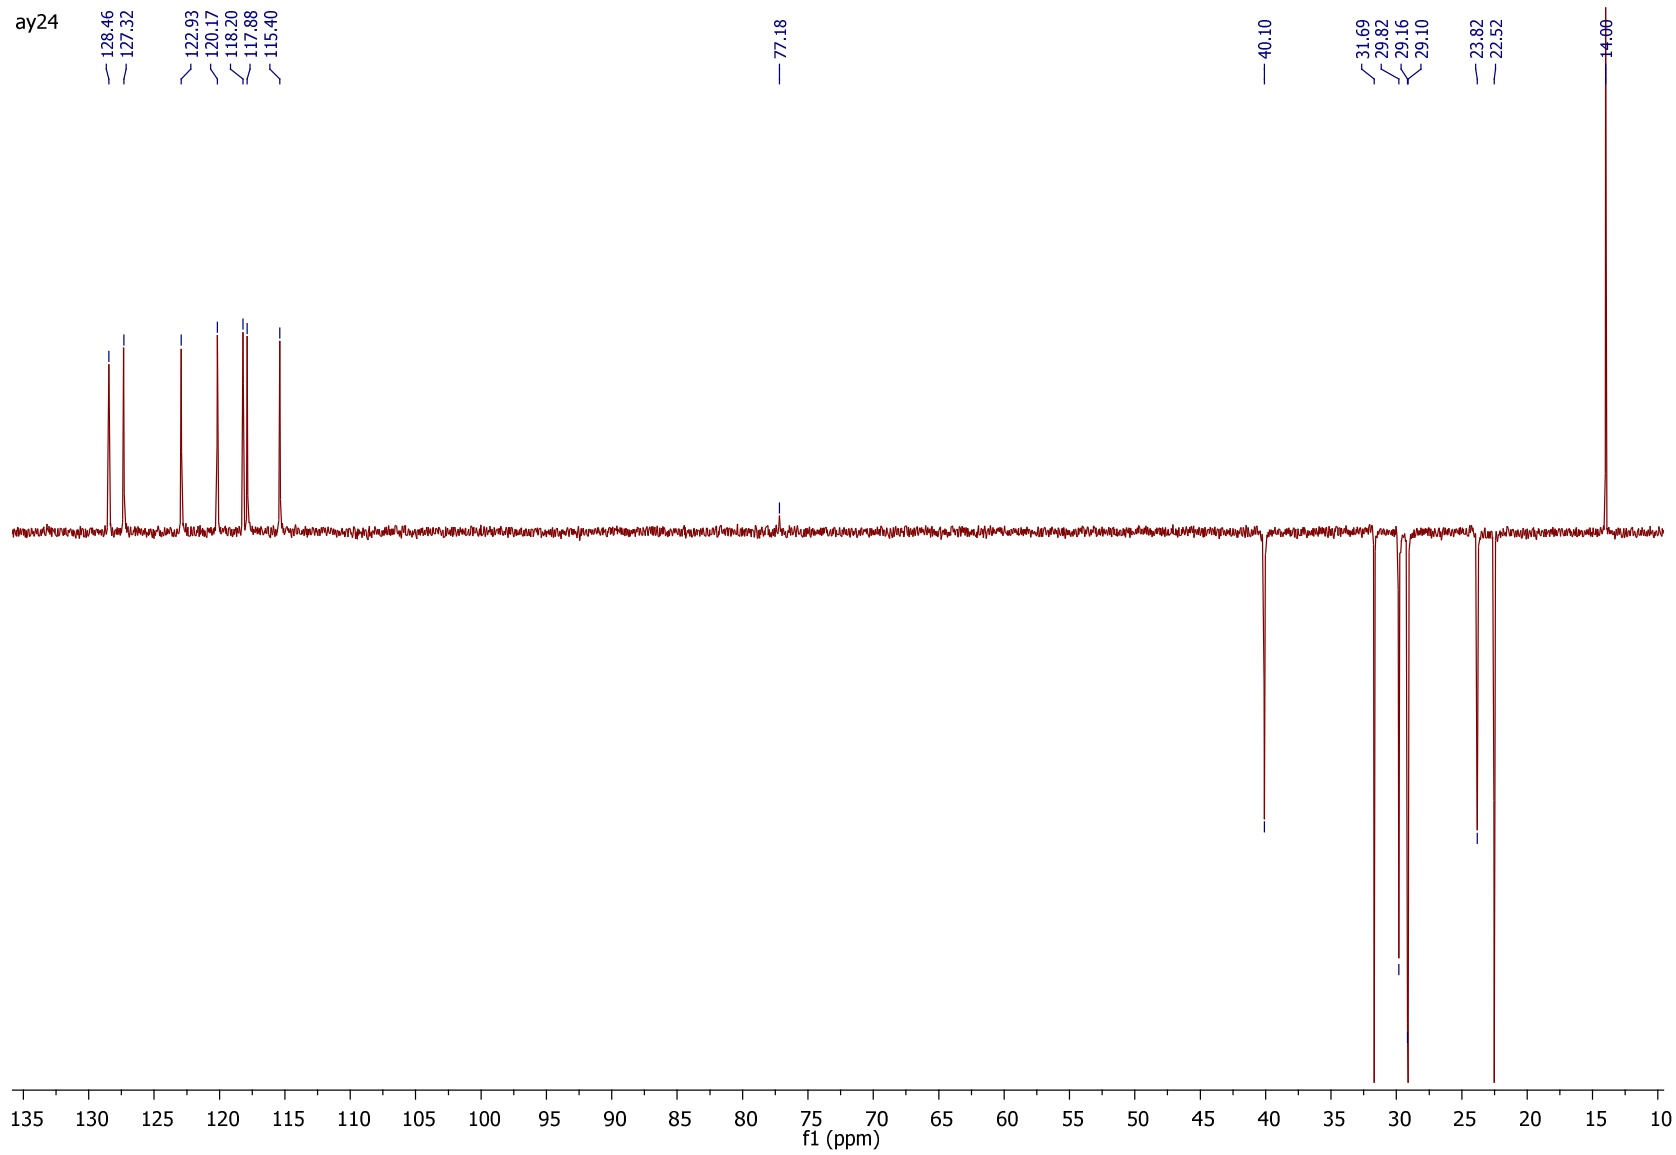

Supplement: c3tc31925c.pdf [file c3tc31925c.pdf]
